# Supplementary material
Source: publisher figshare collection journal article supplement (https://acs.figshare.com/ndownloader/files/14449079)
Supplement: Supplementary file 1 [file 14449079]

## Supporting Information

### P-type Doping of Graphene with Cationic Nitrogen

Sangwoo Chae,<sup>†</sup> Gasidit Panomsuwan,<sup>‡</sup> Maria Antoaneta Bratescu,<sup>†</sup> Katsuya Teshima,<sup>§</sup>  
Nagahiro Saito<sup>\*,†,||</sup>

<sup>†</sup> Department of Chemical Systems Engineering, Graduate School of Engineering, Nagoya University, Furo-cho, Chikusa-ku, Nagoya 464-8603, Japan

<sup>‡</sup> Department of Materials Engineering, Faculty of Engineering, Kasetsart University, Chatuchak, Bangkok 10900, Thailand

<sup>§</sup> Department of Materials Chemistry, Faculty of Engineering, Shinshu University, Wakasato, Nagano, 380-8553, Japan

<sup>||</sup> Conjoint Research Laboratory in Nagoya University, Shinshu University, Furo-cho, Chikusa-ku, Nagoya 464-8603, Japan

\*Corresponding author: hiro@sp.material.nagoya-u.ac.jp

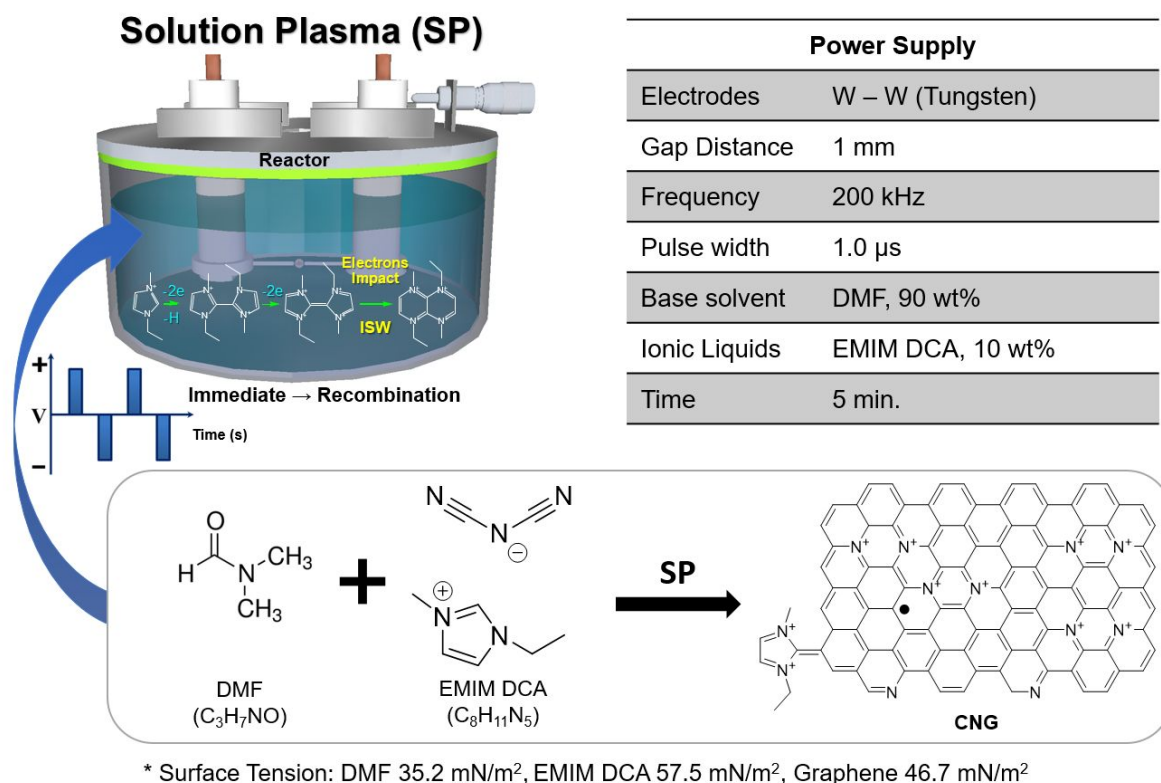

**Figure S1.** Schematic illustration of experimental setup for the solution plasma process. Note that the amount of ENIM DCA was limited to 10 wt% in this work owing to its high price. The increase of EMIM DCA amount may lead to change in properties of CNG, such as crystal structure, cationic N doping level, and N bonding configuration, which is still under progress and investigation.

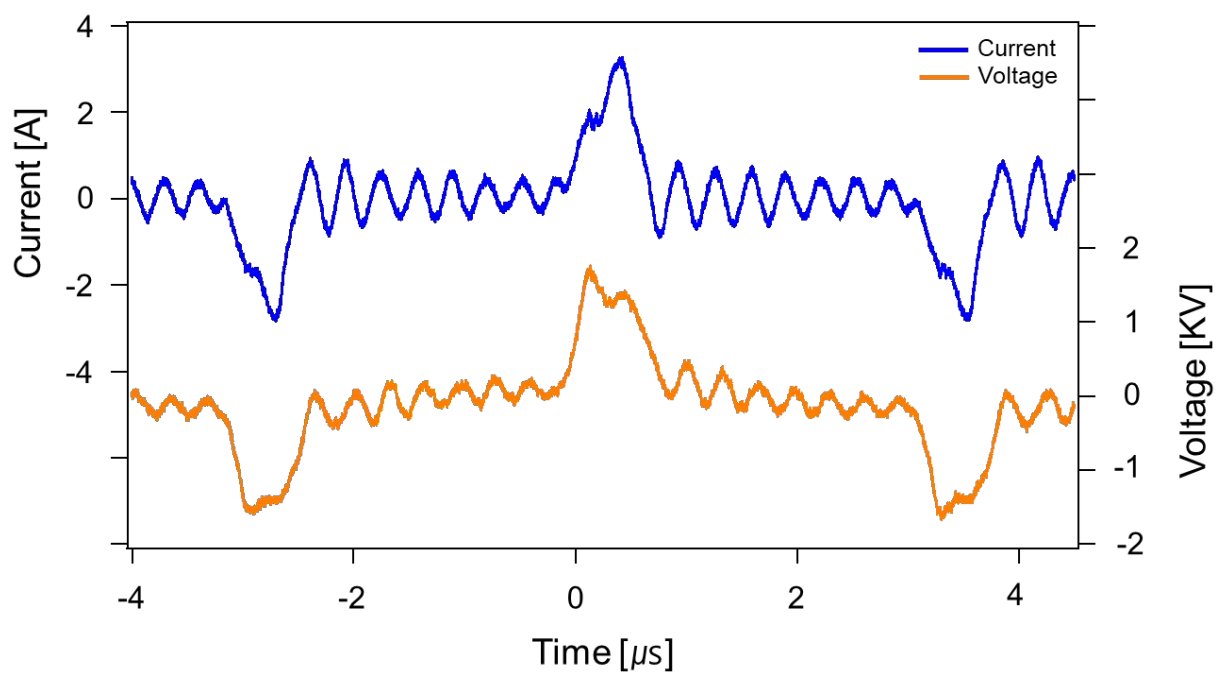

**Figure S2.** Typical current and voltage waveforms of plasma during the synthesis of CNG.

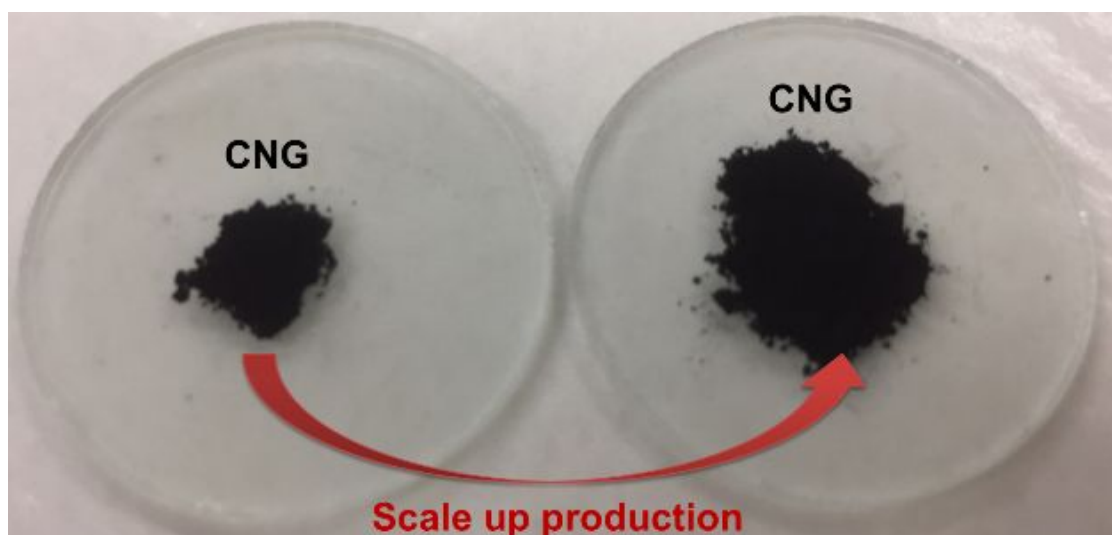

**Figure S3.** Photograph of CNG with scale-up production.

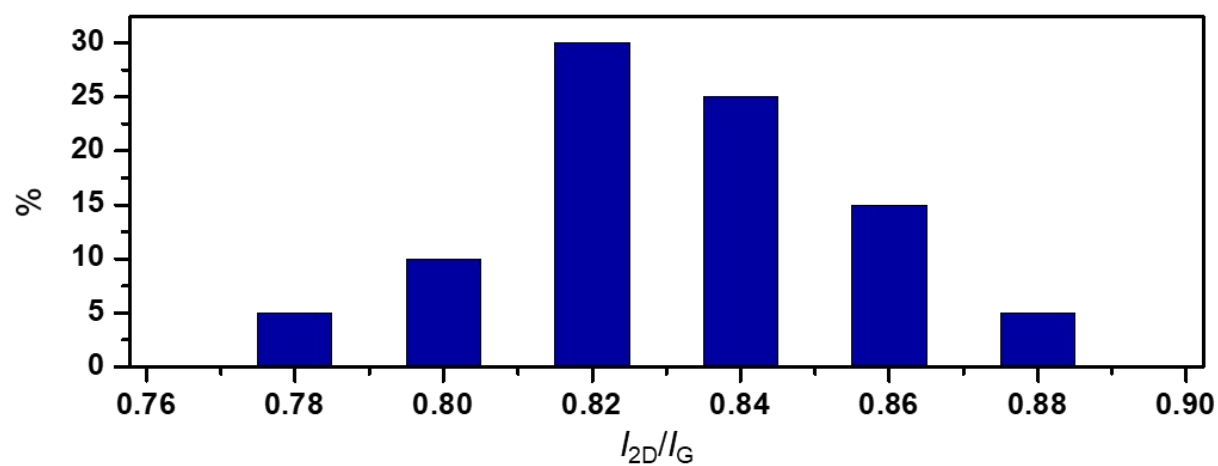

**Figure S4.** Statistical analysis of the Raman spectra of  $I_{2D}/I_G$  of the CNG obtained from 30 random spots.

**Table S1.** N-doped methods and nitrogen concentration on carbon

| Materials              | Elemental composition (at%) |     |         | Method                                  | Ref.         |
|------------------------|-----------------------------|-----|---------|-----------------------------------------|--------------|
|                        | C                           | O   | N       |                                         |              |
| CNG                    | 81.4                        | 5.2 | 13.4    | SP                                      | Present work |
| N-doped carbon sheet   | -                           | -   | 3.1     | SP                                      | S1           |
| N-doped graphene oxide | -                           | -   | 6.7     | Hydrothermal                            | S2           |
| N-doped graphene sheet | -                           | -   | 3.0-5.0 | Thermal treatment                       | S3           |
| N-doped CNFs           | -                           | -   | 5.4     | Electrospinning                         | S4           |
| N-doped graphene       | -                           | -   | 4.0     | CVD                                     | S5           |
| N-doped graphene       | -                           | -   | 1.0     | N <sub>2</sub> H <sub>4</sub> treatment | S6           |

**Table S2.** Electrical conductivity of CNG by SP compared to other carbon materials in literature.

| Materials               | Type     | Doping | Surface resistance<br>[ $\Omega$ sq <sup>-1</sup> ] | Hall mobility<br>[cm <sup>2</sup> V <sup>-1</sup> s <sup>-1</sup> ] | Carrier concentration<br>[cm <sup>-3</sup> ] | Ref.         |
|-------------------------|----------|--------|-----------------------------------------------------|---------------------------------------------------------------------|----------------------------------------------|--------------|
| CNG                     | P        | N      | 16.0                                                | 3.4                                                                 | 1.00E+19                                     | Present work |
| PECVD                   | P        | Au     | -                                                   | 25                                                                  | 7.00E+17                                     | S7           |
| P-doped graphene by MBE | P        | P      | -                                                   | 25                                                                  | 1.40E+17                                     | S8           |
| Graphene-GaN            | P        | -      | -                                                   | 2.4                                                                 | 8.00E+17                                     | S9           |
| Graphene-Zinc Phosphide | P        | -      | -                                                   | -                                                                   | 6.00E+16                                     | S10          |
| Graphite                | Pristine | -      | -                                                   | -                                                                   | 5.00E+18                                     | S11          |

## References

- (S1) Hyun, K.; Ueno, T.; Li, O. L.; Saito, N., Synthesis of Heteroatom-Carbon Nanosheets by Solution Plasma Processing Using N-Methyl-2-Pyrrolidone as Precursor. *RSC Adv.* **2016**, *6*, 6990–6996.
- (S2) Yang, J.; Jo, M. R.; Kang, M.; Huh, Y. S.; Jung, H.; Kang, Y.-M., Rapid and Controllable Synthesis of Nitrogen Doped Reduced Graphene Oxide Using Microwave-Assisted Hydrothermal Reaction for High Power-Density Supercapacitors. *Carbon* **2014**, *73*, 106–113.
- (S3) Qiu, Y.; Zhang, X.; Yang, S., High Performance Supercapacitors Based on Highly Conductive Nitrogen-Doped Graphene Sheets. *Phys. Chem. Chem. Phys.* **2011**, *13*, 12554–12558.
- (S4) Huang, K.; Li, M.; Chen, Z.; Yao, Y.; Yang, X., Nitrogen-Enriched Porous Carbon Nanofiber Networks for Binder-Free Supercapacitors Obtained by Using a Reactive Surfactant as a Porogen. *Electrochim. Acta* **2015**, *158*, 306–313.
- (S5) Qu, L.; Liu, Y.; Baek, J.-B.; Dai, L., Nitrogen-Doped Graphene as Efficient Metal-Free Electrocatalyst for Oxygen Reduction in Fuel Cells. *ACS Nano* **2010**, *4*, 1321–1326.
- (S6) Wang, D.-W.; Gentle, I. R.; Lu, G. Q. M., Enhanced Electrochemical Sensitivity of PtRh Electrodes Coated with Nitrogen-Doped Graphene. *Electrochem. Commun.* **2010**, *12*, 1423–1427.
- (S7) Wang, W.; Leung, K.; Fong, W.; Wang, S.; Hui, Y.; Lau, S.; Chen, Z.; Shi, L.; Cao, C.; Surya, C., Molecular Beam Epitaxy Growth of High Quality P-Doped Sns Van Der Waals Epitaxy on a Graphene Buffer Layer. *J. Appl. Phys.* **2012**, *111*, 093520.
- (S8) Min, J.-H.; Jeong, W.-L.; Kwak, H.-M.; Lee, D.-S., High-Performance Metal Mesh/Graphene Hybrid Films Using Prime-Location and Metal-Doped Graphene. *Sci. Rep.* **2017**, *7*, 10225.

- (S9) Tian, H.; Liu, Q.; Hu, A.; He, X.; Hu, Z.; Guo, X., Hybrid Graphene/Gan Ultraviolet Photo-Transistors with High Responsivity and Speed. *Opt. Express* **2018**, *26*, 5408–5415.
- (S10) Vazquez-Mena, O.; Bosco, J. P.; Ergen, O.; Rasool, H. I.; Fathalizadeh, A.; Tosun, M.; Crommie, M.; Javey, A.; Atwater, H. A.; Zettl, A., Performance Enhancement of a Graphene-Zinc Phosphide Solar Cell Using the Electric Field-Effect. *Nano Lett.* **2014**, *14*, 4280–4285.
- (S11) Novoselov, K. S.; Geim, A. K.; Morozov, S. V.; Jiang, D.; Zhang, Y.; Dubonos, S. V.; Grigorieva, I. V.; Firsov, A. A., Electric Field Effect in Atomically Thin Carbon Films. *Science* **2004**, *306*, 666–669.
